# Supplementary material for: School Teachers’ Perceptions of Adolescent Human Papillomavirus (HPV) Vaccination: A Systematic Review
Source: MDPI journal article supplement (doi:10.3390/vaccines12040361), 2024-03-27
Supplement: s1 [file s1]

# Supplementary Material

**Table S1.** Overview of the quality assessment tools.

| Study design  | Assessment tool | Items                                                                                                                 | Rating                           |
|---------------|-----------------|-----------------------------------------------------------------------------------------------------------------------|----------------------------------|
| Quantitative  | JBI Checklist   | 1. Were the criteria for inclusion in the sample clearly defined?                                                     | Yes<br>No<br>Unclear             |
|               |                 | 2. Were the study subjects and the setting described in detail?                                                       |                                  |
|               |                 | 3. Was the exposure measured in a valid and reliable way?                                                             |                                  |
|               |                 | 4. Were objective, standard criteria used for measurement of the condition?                                           |                                  |
|               |                 | 5. Were confounding factors identified?                                                                               |                                  |
|               |                 | 6. Were strategies to deal with confounding factors stated?                                                           |                                  |
|               |                 | 7. Were the outcomes measured in a valid and reliable way?                                                            |                                  |
|               |                 | 8. Was appropriate statistical analysis used?                                                                         |                                  |
| Qualitative   | CASP Checklist  | 1. Was there a clear statement of the aims of the research?                                                           | Low risk<br>High risk<br>Unclear |
|               |                 | 2. Is a qualitative methodology appropriate?                                                                          |                                  |
|               |                 | 3. Was the research design appropriate to address the aims of the research?                                           |                                  |
|               |                 | 4. Was the recruitment strategy appropriate to the aims of the research?                                              |                                  |
|               |                 | 5. Was the data collected in a way that addressed the research issue?                                                 |                                  |
|               |                 | 6. Has the relationship between researcher and participants been adequately considered?                               |                                  |
|               |                 | 7. Have ethical issues been taken into consideration?                                                                 |                                  |
|               |                 | 8. Was the data analysis sufficiently rigorous?                                                                       |                                  |
|               |                 | 9. Is there a clear statement of findings?                                                                            |                                  |
|               |                 | 10. How valuable is the research                                                                                      |                                  |
| Mixed methods | MMAT            | 1. Is there an adequate rationale for using a mixed methods design to address the research question?                  | Yes<br>No<br>Can't tell          |
|               |                 | 2. Are the different components of the study effectively integrated to answer the research question?                  |                                  |
|               |                 | 3. Are the outputs of the integration of qualitative and quantitative components adequately interpreted?              |                                  |
|               |                 | 4. Are divergences and inconsistencies between quantitative and qualitative results adequately addressed?             |                                  |
|               |                 | 5. Do the different components of the study adhere to the quality criteria of each tradition of the methods involved? |                                  |
